# Supplementary material
Source: PubMed Central journal article supplement (PMC4946968)

# H3K4me3

# H3K27me3

# H3K4me3

# H3K27me3

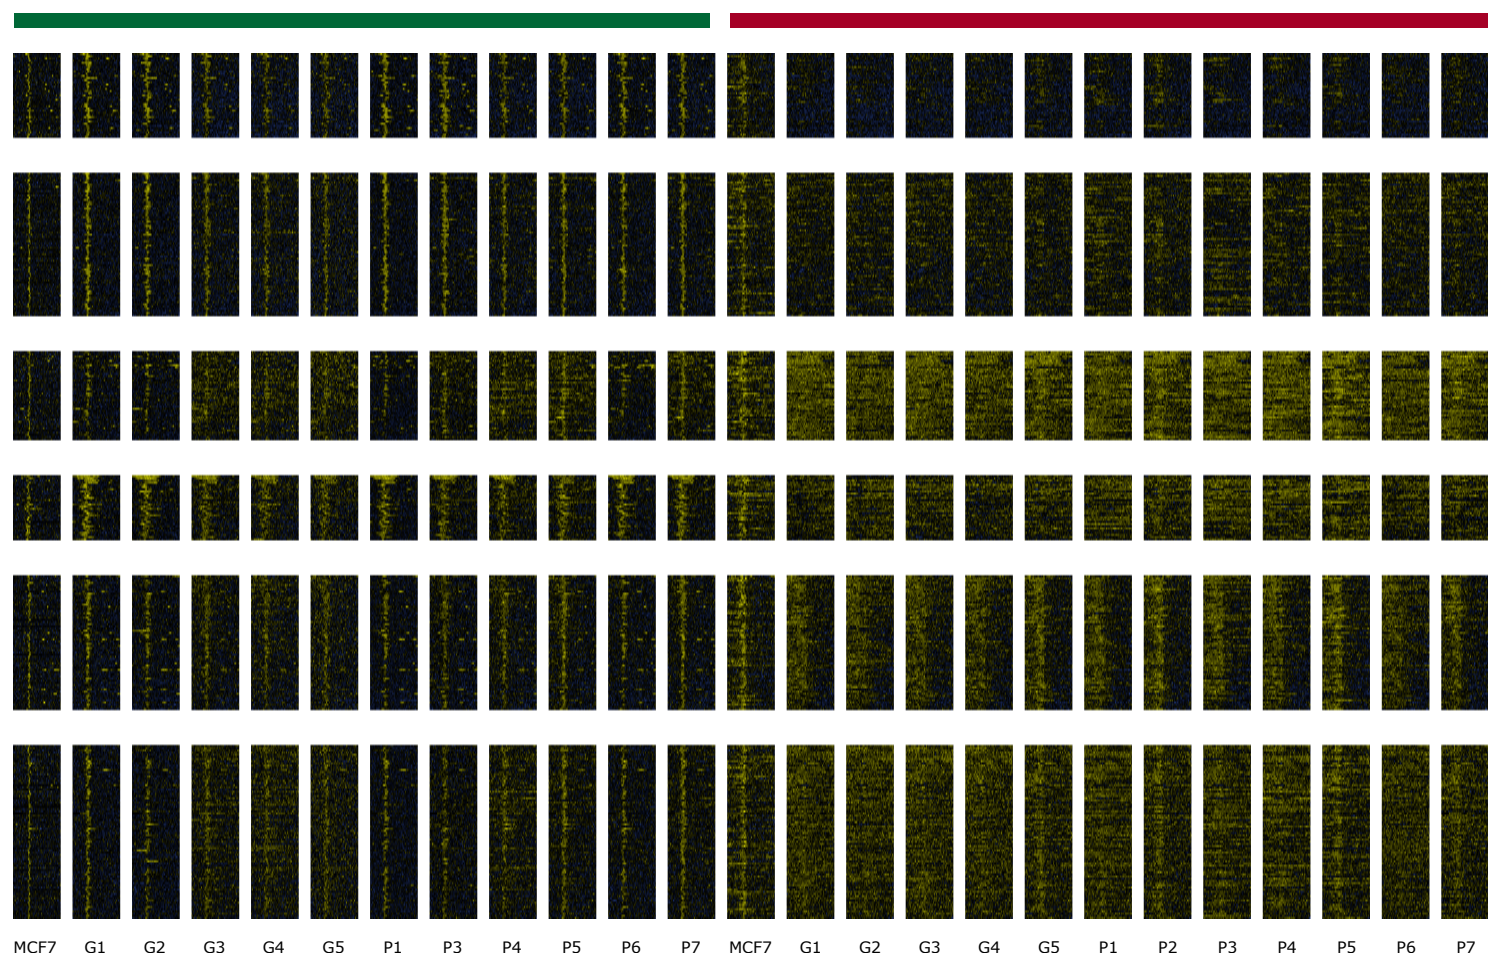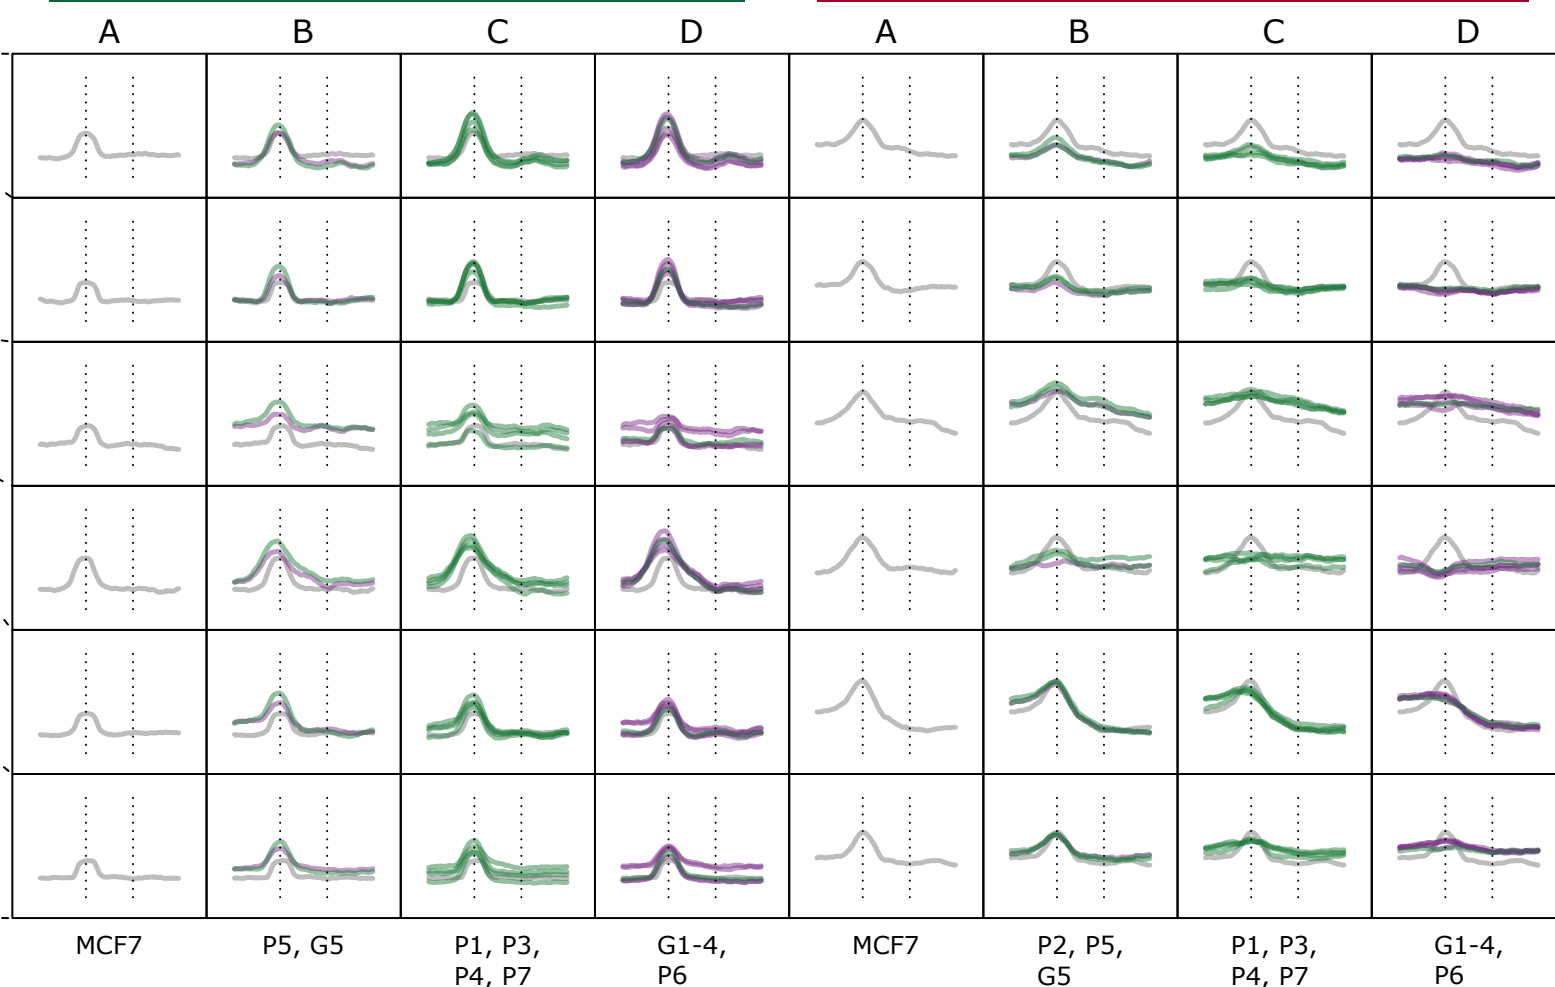

z-score  $\log_2$  FE

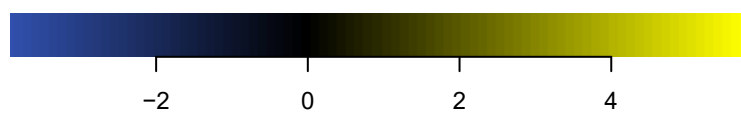

## Patient Outcome

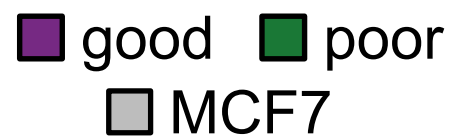

Supplement: NIHMS767550-supplement-Supp_Fig_S1.pdf [file NIHMS767550-supplement-Supp_Fig_S1.pdf]
